# Supplementary material
Source: publisher figshare collection journal article supplement (https://aacr.figshare.com/ndownloader/files/39861969)
Supplement: Supplementary file 1 [file 39861969]

## Sheet: surv_table
Supplementary Table S7- Cox proportional hazard model meta-z-scores for PRECOG cancer types
	Adrenocortical	Bladder	Astrocytoma	Glioblastoma	Glioma	Medulloblastoma	Meningioma	Neuroblastoma	Breast	Colon	Gastric	Head and neck	Kidney	Liver	Lung adenocarcinoma	Lung large-cell	Lung small-cell	Melanoma	Mesothelioma	Ovarian	Pancreatic	Prostate	Sarcoma
MF.PPARneg.LU	-1.61635	2.47466	3.53254	3.3292	5.88944	0.349152	-0.160755	0.292391	1.02868	1.67965	0.291187	1.75389	0.499882	-2.11024	4.53823	1.14168	1.89585	3.53356	-0.383489	5.11947	-0.545195	2.27125	-0.937724
T.4pos8INT.TH	1.9686	-1.01361	-2.64982	-2.12523	-5.88664	-0.84247	0.000998536	0.262149	-5.302	1.24543	-0.0860543	-0.660226	0.676862	0.1445	-3.31885	0.622837	-0.719719	-3.86015	0.632732	0.739397	-0.711202	-1.64244	0.810541
T.4FP3pos25pos.SP	0.736726	-2.59266	-2.32629	-2.33365	-5.6437	-0.345002	-0.729183	0.219137	-5.01522	-0.83767	-0.000809131	0.440022	-2.29755	0.261783	-5.15754	1.52259	-0.0456884	-5.7421	0.756742	-0.667711	-0.552886	-4.00782	-0.0605588
B.FRE.BM	-1.25473	1.0161	-2.52512	-0.340317	1.1392	-0.944209	0.719743	-1.25276	2.96528	1.93017	-0.765754	-1.31054	1.4106	0.504488	-2.9667	0.44114	0.130909	-3.26371	0.92392	-2.64995	0.46921	-1.65813	-1.06236
B.FRF.BM	-1.4889	-1.44551	-3.94094	-1.63728	-1.80139	-1.26439	0.0765255	-3.29679	-2.28334	0.740565	-1.12096	-1.09197	0.267951	-0.421537	-5.53932	-0.749935	-1.61103	-5.48294	0.338885	-3.39231	-1.59034	-6.77676	-1.93743
TGD.SP	-0.11058	-1.08261	-1.83291	-1.53436	-2.46264	-0.593417	-1.28899	-1.98268	-4.07884	-0.709743	0.0683434	0.782405	-1.46884	-1.06119	-5.04633	-0.639744	-1.40789	-5.60985	0.543559	-0.663174	-0.743575	-2.2219	-1.31934
TGD.VG2pos.ACT.SP	-0.0478151	-2.94785	-2.47037	-1.50935	-5.54836	-0.324102	-1.80828	-2.41414	-4.28914	-1.02048	-0.2905	0.104252	-2.06964	0.238757	-4.76155	0.743454	-0.384816	-4.82318	0.753443	-1.65084	-1.04263	-4.39592	-1.2559
TGD.VG2neg.ACT.SP	-0.159962	-0.269325	-2.44072	-1.97249	-4.29878	-1.01675	-1.01553	-1.6367	-3.61709	-1.15755	-0.26035	-1.10384	-1.61781	-0.0416532	-4.40684	-0.688457	-1.42873	-5.76261	0.844883	-2.79896	0.501652	-4.40351	-1.24499
TGD.VG2neg.SP	0.584339	-3.4257	-3.65406	-3.09975	-6.72172	-0.627673	-1.54731	-1.76538	-5.80606	-0.113512	-0.578565	-1.2115	-1.82211	0.401784	-7.03061	-0.980938	-2.68984	-5.61409	0.0490028	-1.70272	0.179353	-5.60653	-1.21058
B.FO.PC	-1.04105	-2.00924	-3.87107	-2.57513	-4.73668	-0.924018	-0.422715	-2.99571	-4.18752	1.16482	-0.925498	-0.572263	-1.23836	0.0479401	-6.86467	-0.894699	-1.94343	-5.19742	0.29103	-1.19828	-1.49939	-7.40453	-1.56718
B.MZ.SP	-2.62557	-3.13642	-4.40294	-2.86054	-3.51966	-1.95395	-0.0894748	-0.930593	-2.96372	-0.644764	-0.959138	-1.53887	1.05859	-0.657623	-6.1123	-2.75607	-3.37973	-4.27517	-1.8455	-3.14015	-0.498642	-3.35282	-0.736131
B.T1.SP	-1.44677	-3.1819	-4.41284	-1.63049	-1.11331	-1.05218	0.145344	-3.2696	-2.30683	1.71509	-0.618712	-0.877587	0.507463	0.320974	-6.48162	-1.59837	-2.88207	-3.56126	-0.61573	-2.96184	-1.38097	-3.11842	-1.57193
B1A.PC	-1.41535	-3.31942	-3.22779	-1.90971	-1.76904	-0.744944	-0.557439	-2.402	-2.45502	0.103834	-0.694645	-1.87418	0.56981	0.422874	-5.4015	-1.92464	-2.65017	-3.50331	-0.405561	-2.91173	-1.39469	-5.54451	-1.19318
DC.103pos11Bneg.LU	-0.373363	4.04742	3.19864	4.13765	6.05119	1.06287	-0.414653	-1.01113	1.46169	1.68412	1.38098	1.51479	-0.0353193	1.18805	2.13685	2.00711	2.81381	1.46076	0.856844	4.10956	-0.37492	-2.58205	-1.38546
DC.103pos11Bneg.LV	0.215004	3.23304	1.61216	2.56086	5.07217	0.437031	-1.32406	-2.68654	0.517617	1.55022	1.80498	2.13327	-1.43022	0.739525	1.64804	1.86098	2.84426	0.0421052	-0.264496	2.76506	-0.85183	-0.663185	-0.810491
DC.103neg11Bpos.LV	-0.567726	2.43171	0.853075	1.98881	5.69153	0.287644	-1.35878	-1.77267	-0.832101	0.520852	0.943854	3.46381	-0.730593	-0.945249	0.154794	0.166613	1.39756	-1.88725	-0.804989	2.19823	-0.255242	-1.66788	-1.79576
DC2.MLN	-0.0597688	0.266736	-1.44432	0.764407	1.85614	0.275746	-1.07505	-1.46252	-1.96045	0.121422	0.260385	1.33281	-0.823512	0.80597	-0.824037	0.780926	0.670161	-3.31562	-0.738263	0.723099	-1.08105	-5.77535	-1.15144
DC2.LN	-0.0632348	0.331356	-0.616027	1.01474	3.23648	0.356077	-1.50681	-1.16659	-1.4303	0.285575	0.291434	3.2582	-1.16496	-0.160042	-0.376322	1.42813	1.74693	-2.82298	0.0510242	0.46676	-0.104627	-5.18465	-1.65164
DC2.SP	-0.604408	0.663858	-0.0460981	1.57133	1.71884	0.637037	0.147643	-0.879606	-0.14644	-0.456409	-0.316236	0.34117	-0.115037	1.40909	1.94971	-0.309933	0.36281	0.493929	-0.696187	1.08329	-0.535285	-2.82246	-0.260658
DC1.MLN	-0.642545	0.602744	-1.08247	1.06512	1.50273	0.657436	0.0728467	-1.83985	-0.919148	0.522485	0.164862	0.485888	-0.383362	1.29045	0.150582	0.679124	1.62557	-2.0829	-0.749329	1.22171	-1.23243	-4.61111	-0.850084
DC1.LN	-0.368943	-0.234235	-0.0886591	1.5922	1.27359	0.967555	-1.52441	-1.48954	-0.926475	0.334692	0.537253	0.470812	-0.592698	1.25108	0.516512	1.86806	1.69969	-1.72306	-0.283813	0.790713	-0.567675	-3.5408	-0.532306
DC1.SP	-1.93156	-0.0564035	-1.33276	0.710646	0.714757	0.0888436	0.119936	-0.995745	-1.18768	0.0994647	-0.188938	-0.150105	-0.284854	1.79622	0.404301	0.258984	1.48613	0.709006	-1.06775	0.889878	-1.16717	-4.17325	-0.530046
DC.8neg4neg11Bpos.MLN	-1.57046	1.86411	-0.118498	1.8197	1.30705	0.0441453	-0.299488	-1.94153	-1.57656	0.432633	0.311851	1.72016	-0.618027	0.395193	0.0984525	0.26581	0.99904	-1.90956	-1.0608	1.49089	-0.655851	-4.22207	-0.771553
DC3.SP	0.296795	0.891378	-1.08187	0.276589	1.67619	-0.00288128	-1.56524	-1.21097	-1.13629	0.629906	0.398735	2.88584	-2.02348	0.470689	-0.381979	1.61299	1.08694	-2.05643	0.140466	2.13892	-1.19008	-5.8704	-0.739518
DC7.LN	-0.713692	1.53682	-0.840156	-0.0890357	-2.6212	0.330911	-0.547446	-1.9538	-3.5166	1.69191	-0.00904205	0.727081	-1.45497	0.465526	-1.44952	0.606659	0.882244	-0.62468	-1.15679	2.68774	-0.836599	-4.8861	-1.13182
DC6.LN	-0.603936	1.08914	-1.90241	-0.310859	-2.04412	0.0573976	-1.448	-1.95545	-3.63039	1.49176	0.528143	1.45603	-2.25553	0.623414	-2.02111	0.975047	1.14494	-1.58786	-0.390137	2.8736	-1.24489	-5.51538	-1.21263
DC8.LN	-0.627825	3.32665	1.44967	0.869304	0.650852	0.709933	-0.359926	-1.48548	-3.86852	1.42782	0.310607	1.97684	-1.45774	1.28827	0.922238	-0.18868	0.814662	0.937287	-2.49126	2.39459	-0.776222	-4.24797	-0.269432
DC9.LN	0.351718	4.05991	-0.202582	0.19888	-1.50124	0.113584	-0.504834	-2.99074	-2.01798	1.28827	0.375277	1.04814	-0.987423	1.25915	-0.817193	0.637106	1.15835	-2.11956	-0.489078	2.46889	-1.19089	-4.47357	-1.44947
DC.LC.SK	-0.502275	1.88606	3.04152	3.05236	4.67579	0.193616	-0.0951779	-1.29546	2.05163	2.24895	0.704674	1.62709	0.883556	0.626793	4.27568	2.77035	3.94713	0.751133	0.421704	4.8408	-0.164153	-4.27269	0.694337
MF.LU	-1.12309	2.72806	3.59402	3.17456	6.20442	0.736083	-0.168877	0.942694	1.25844	1.97602	0.53204	1.67851	0.549044	-1.30835	4.77681	0.87777	2.27673	3.7955	-1.37173	5.55514	-0.91357	2.25478	-0.694541
NK.49CIpos.SP	-1.14015	-1.9654	-3.07361	-1.50439	-3.97106	0.834225	-1.58391	-1.65893	-5.40969	-0.218647	-0.239956	1.8143	-3.99268	-0.623382	-4.35424	-0.656442	-1.39676	-4.15862	0.0276927	-0.581771	-0.381268	-5.95379	-2.03619
NK.49CIneg.SP	-1.44598	-2.74167	-3.63701	-2.31424	-4.4962	0.205818	-1.45142	-2.37201	-6.09609	-0.952775	-0.430332	-0.446301	-1.83108	-0.387357	-4.89835	-1.91417	-2.13513	-6.64431	-0.0429351	-2.03395	-0.756644	-4.51124	-1.62646
NK.B2Mneg.SP	-1.17905	-3.13517	-4.27147	-1.71214	-5.21477	-0.233432	-1.41409	-2.42877	-6.02793	-0.867852	-0.835937	-0.317702	-2.06085	-0.250137	-5.13274	-1.74762	-2.81172	-4.49124	-0.158628	-1.14948	-0.518657	-5.64641	-2.38712
NK.DAP10neg.SP	-1.53611	-2.65738	-3.33482	-1.83857	-5.34831	0.377279	-1.28259	-1.67063	-5.16338	-1.23602	-0.928539	-0.138924	-1.45739	0.223135	-4.18277	-0.974872	-2.04392	-6.20393	0.533228	-0.693358	-1.1452	-4.19539	-2.03322
NK.DAP12neg.SP	-1.59013	-1.73465	-4.12699	-1.82973	-5.24617	0.855417	-1.00203	-1.54799	-5.55948	-0.381026	-1.22157	-1.27678	-1.74981	-0.7095	-3.9562	-0.206604	-2.06531	-5.25258	0.676858	-2	-0.0441744	-2.17452	-1.69242
NK.Hpos.MCMV1.SP	1.37692	2.55941	-1.94784	0.601678	-2.38568	1.98068	0.119518	0.658412	2.92937	-2.30531	-0.682432	1.00548	1.26065	1.15868	3.41184	2.33192	1.38175	-1.46957	1.79841	-1.91693	0.972173	5.69217	1.22672
NK.Hpos.MCMV7.SP	0.82369	1.33176	-3.19651	-0.913835	-2.86154	1.01651	-0.456632	-1.44286	-2.32411	0.0977404	-0.579957	0.0840386	-1.76716	-0.0533806	-1.69394	0.202759	-0.937465	-4.87687	0.617956	-0.195082	-0.0693447	3.75442	-1.13035
NK.HposMCMV1	2.13637	3.36518	-0.125539	1.08875	-2.40783	1.9585	0.962255	1.97933	2.1639	-1.73638	0.0939418	0.0348581	0.608112	2.17846	4.20056	2.74571	1.72583	-2.9007	1.78327	-1.19891	1.43031	5.61535	2.00352
NK.MCMV7	-2.22947	0.99637	-3.90944	0.0747088	-3.37438	0.940844	-0.714537	-1.05603	-4.00442	-1.34307	-1.15165	-0.455344	-0.956441	-0.0739073	-0.778756	-0.347404	-1.90125	-5.69748	0.670437	-1.82515	-1.24688	3.23501	-1.15527
NK.SP	-1.17707	-3.08667	-3.15002	-1.52999	-4.5108	-0.247175	-1.31193	-2.19137	-5.41738	-0.550423	-0.12134	0.927999	-3.57867	-0.125605	-4.68082	-0.232164	-0.739724	-4.35955	0.270737	-0.867981	-0.23061	-6.55348	-1.78162
NKT.4pos.LV	2.83744	-3.79255	-1.49109	-1.7776	-5.59375	0.736511	-0.11045	1.96835	-5.83332	-1.4298	-0.58572	-1.70712	-0.934854	1.23626	-1.67599	-2.20443	-2.47029	-4.91796	-1.15106	-4.23392	0.199242	-4.29707	0.0112736
NKT.4pos.SP	0.888024	-2.84292	1.25157	0.723295	-2.6118	1.24144	-0.258967	0.901055	-1.26891	-0.47429	-0.0979639	0.769753	-1.55728	-0.0751038	-0.473695	1.07086	0.688897	-3.0031	0.864062	-1.08975	0.0812347	-3.35915	0.29558
NKT.4neg.LV	0.547632	-3.07335	-2.86561	-1.39221	-6.08297	0.958316	-0.264591	0.706125	-6.48832	-0.273117	-0.595146	0.562343	-1.41514	0.447132	-2.76136	0.607108	0.380223	-5.39159	0.187442	-1.53513	-0.574766	-5.88896	-0.892699
NKT.4neg.SP	3.17013	-1.75952	-3.19091	-1.26526	-3.79193	0.447303	0.0686939	1.11416	-5.62024	-0.812135	-0.381075	-1.04035	-2.10203	1.11808	-1.2382	0.358625	0.115404	-6.37621	0.188571	-1.50275	-1.42924	-3.83459	-0.552272
NKT.44posNK1.1pos.TH	2.49548	-2.94494	0.620822	0.0135425	-3.71144	1.95062	-0.133924	0.738317	-2.34174	-1.58882	-0.766774	0.0334793	-1.61386	0.681437	-0.275739	0.602553	0.570405	-5.3002	0.311732	-2.64841	0.171229	-3.19648	-0.0240691
PROB.FRA.BM	0.570568	5.25792	2.75154	1.50569	1.43543	1.20918	0.481917	4.59656	4.53408	0.482985	1.19	0.367818	1.79394	2.77231	6.66899	3.51187	2.88975	2.34632	1.5083	1.93828	0.237618	3.28238	2.28107
T.4MEM.LN	1.78299	-1.47776	-3.04281	-1.50171	-4.14436	-0.0680347	-0.282496	-0.372513	-3.20827	-0.967157	-0.340288	-1.20717	-0.644375	-0.428378	-3.8425	0.926022	-1.06976	-6.24519	1.13648	-1.62306	0.911928	0.943795	0.283179
T.4MEM.SP	1.71689	-2.07148	-2.09107	-1.42287	-4.00435	1.15389	-0.383632	1.285	-2.00265	-1.67207	-0.0916544	-1.95789	-0.0976199	0.128284	-2.42589	-0.487034	-2.51325	-5.45188	1.92041	-4.76456	1.16619	5.60875	0.831104
T.4MEM44H62L.SP	2.20484	-3.32767	-2.38794	-1.74382	-5.63827	1.3143	-0.620071	-0.12329	-5.37534	-1.97945	-0.289006	-1.64743	-0.565011	-0.313515	-3.9789	-1.246	-2.73506	-6.6422	-0.895049	-3.76409	0.136684	-3.92965	0.438286
T.8EFF.SP.OT1.D15.VSVOVA	0.238818	-1.23323	-2.3344	-1.43241	-5.10281	0.0125464	-1.63682	-1.0823	-4.63166	-0.307032	-0.347096	-0.26653	-2.65011	-0.0566305	-4.25486	0.415084	-0.93829	-5.46887	0.66368	-1.76391	0.64038	-4.43986	-1.40443
T.8EFF.SP.OT1.D5.VSVOVA	1.23741	3.87624	3.85467	2.15708	2.82013	3.54639	0.730946	2.89786	5.48885	-0.846984	0.16847	-2.39962	1.62812	1.4071	4.94212	1.66369	0.29479	-0.405016	2.51637	-2.45829	1.48041	10.6321	1.8133
T.8EFF.SP.OT1.D6.VSVOVA	2.20506	1.88592	0.0519622	0.721236	-0.876216	0.983341	-0.755713	0.738152	0.147136	-0.757395	0.336694	-1.76928	-0.971073	0.462225	0.86584	2.71566	0.516541	-5.09366	1.44893	-1.34087	0.201983	6.25606	0.133022
T.8EFF.SP.OT1.D8.VSVOVA	0.184117	-2.55217	-2.98616	-1.1506	-5.70166	0.305738	-1.32211	-0.904781	-4.59916	-0.404744	-0.743398	-0.450963	-0.581934	-0.231238	-4.76374	0.698435	-1.10275	-6.13562	0.858532	-2.82037	0.247072	-3.02264	-1.98556
T.8MEM.LN	0.871752	-2.73237	-1.64566	-0.781715	-4.90847	0.556502	-0.510156	0.0953135	-2.3968	-1.06557	-0.440202	0.276359	-0.724402	0.14964	-3.14052	1.09426	-1.1696	-5.15245	1.09306	-2.3953	-0.391411	-2.29007	1.46425
T.8MEM.SP	1.41973	-3.20578	-2.73931	-2.7168	-6.32408	1.24478	-0.6674	-0.399273	-1.87502	-1.40509	-1.2155	-2.41759	0.734067	0.57384	-4.50993	-0.292874	-2.31005	-6.20372	0.655856	-3.77399	1.17574	-2.78462	1.009
T.8MEM.SP.OT1.D106.VSVOVA	-0.0246345	-2.92022	-2.7553	-1.46469	-5.5218	0.258545	-1.5474	-0.709529	-6.76046	-0.468897	-0.309123	-0.600815	-2.25253	0.267003	-4.75962	0.264395	-0.652721	-5.47826	-0.0273365	-1.46617	0.537542	-6.23434	-0.947397
T.8MEM.SP.OT1.D45.VSVOVA	-0.528172	-4.63529	-3.8527	-2.24112	-5.80709	0.90028	-0.832284	-1.54562	-6.15793	-1.24717	-1.1692	-1.44253	-0.843619	-0.325049	-6.00861	-0.816428	-2.16204	-6.29806	0.79444	-3.86641	0.123562	-3.20637	-0.83426
T.8NVE.PP	0.412539	-2.81402	-2.86099	-1.85908	-6.45546	-0.405108	-1.11728	-0.370217	-5.74179	0.68101	-0.269653	0.664851	-2.0343	0.689821	-4.11288	0.759502	-1.24642	-4.74286	-0.0131546	0.285341	-0.6291	-7.97036	-0.133852
T.8NVE.SP	0.524086	-3.08109	-2.32706	-1.72787	-6.31348	0.0198783	-0.942612	-0.944897	-3.85013	0.190037	-0.658089	0.843837	-2.73275	-0.0973764	-4.06275	1.23301	-0.0420736	-3.96853	0.566001	-0.41836	-0.310022	-5.11709	0.259264
T.4.PA.BDC	2.22515	-2.10348	-2.85962	-2.91017	-6.77443	-1.13035	-0.333947	0.142887	-3.61313	-0.982093	-0.282593	-1.2701	1.18828	1.12345	-5.20282	-0.788768	-2.03423	-5.88636	0.689686	-3.2145	0.488888	-3.10142	1.11018
TGD.VG2pos.SP	-0.228479	-4.14088	-3.65756	-3.27478	-6.69968	-0.427169	-1.85704	-0.499324	-6.53927	-0.899577	-0.951432	-0.925423	-1.47294	0.190942	-6.51114	-1.33526	-3.60471	-6.21396	-1.65875	-1.62111	-0.946734	-4.41587	0.258607
TGD.VG2pos.SP.TCRBKO	0.352543	-2.47368	-2.39045	-1.79624	-6.44569	-0.151553	-1.09175	-1.10141	-4.99201	-0.553608	-0.340839	0.448909	-2.56786	-0.318101	-5.66866	0.523345	-0.948402	-6.10768	0.368611	-0.783181	0.0891073	-6.14044	-0.889921
TGD.VG2neg.SP.TCRBKO	0.402727	-3.22168	-2.85121	-2.09161	-6.16808	-0.954551	-0.977224	-1.58786	-5.20862	-0.93099	-0.674957	-0.488686	-2.82464	-0.266423	-5.86142	0.359773	-1.42968	-5.7398	0.576296	-1.52005	-0.0468578	-6.70063	-1.04237
TGD.VG5pos.ACT.IEL.	0.744576	2.78854	2.43994	0.011215	1.71022	1.43505	0.306965	2.48799	2.71924	-2.41709	0.158312	0.460158	-2.04225	-0.929055	1.97811	-0.614878	-0.85057	-1.1124	0.117627	-0.54523	0.0633915	0.595574	1.40878
TGD.VG5pos.IEL.	-0.31482	-0.981782	-3.32491	-2.42703	-4.11847	0.246288	-0.323024	0.940278	-2.05049	-1.31986	0.271543	2.00191	-1.87819	-0.543831	-1.237	-0.588833	-2.094	-2.05723	-0.215038	0.0894241	-1.60127	-3.78168	0.720015
TGD.VG5neg.ACT.IEL	-0.354094	0.720413	-2.53506	-2.10216	-3.594	0.703125	-0.0625964	1.45044	-0.46733	-0.909472	0.240847	-2.17474	-0.245018	1.14928	1.71532	-0.192849	-2.79708	-0.969945	0.230015	-2.29609	-0.139632	2.37578	1.55291
TGD.VG5neg.IEL.	-1.01985	-0.649925	-4.15367	-2.62411	-5.73358	-0.220262	-0.391404	-1.16706	-5.98268	-0.378923	-0.0846122	0.998718	-2.83129	-0.641636	-4.22946	-1.65793	-3.13916	-4.40064	-0.661555	-0.36074	-1.70326	-5.82429	-0.577014
NK.49Hpos.SP	-2.03906	-4.4326	-4.32097	-1.55523	-3.39754	1.20527	-0.108444	-0.762423	-4.55386	-1.82282	-1.6529	-1.83488	-1.31535	-1.49499	-4.76176	-1.98906	-3.31419	-5.00201	1.18232	-2.73017	-0.999511	-2.78466	-1.54936
NK.49Hneg.SP	-1.72563	-3.39935	-3.16869	-1.5643	-3.90124	0.367592	-0.894209	-1.956	-5.57596	-1.0234	-0.519966	-0.56283	-2.92234	-0.865404	-5.07734	-0.88442	-1.58556	-5.22046	0.299949	-2.4817	-0.657298	-5.8026	-2.20129
DC.103pos.11Bneg.POLYIC.LU	0.286344	4.22268	2.414	3.49105	5.74409	1.53154	0.0241468	-1.18897	0.33477	1.09664	1.84331	1.8654	-0.321571	1.36469	1.53106	0.0968597	1.22754	-0.623602	-0.778865	2.23099	-0.336563	-2.23919	-1.51361
DC.103neg.11Bpos.POLYIC.LU	-0.266359	4.24824	2.0882	3.20209	5.54952	0.859444	-0.466216	-1.58155	-0.372841	0.736856	1.09155	2.68326	-0.573303	0.619858	0.855819	-1.07275	0.553932	-1.15474	-0.859268	1.77019	-0.426645	-1.5751	-1.14665
DC.8pos.TH	-0.0247166	4.14656	3.51742	2.81301	6.40228	2.49713	1.55773	2.0333	5.80995	-0.256387	-0.21017	-1.70963	2.23285	0.693191	6.18889	1.26559	1.64348	3.3098	-0.563645	2.0592	0.718651	4.6294	0.814109
DC.8neg.TH	-0.003746	3.76913	3.45999	2.8973	6.47372	2.93435	1.46823	1.75672	5.72445	-0.490511	-0.436364	-1.9034	2.75103	0.548964	6.37497	0.555358	1.79048	2.96108	-0.447943	2.0228	0.673171	3.79811	0.509496
DC.8neg4neg11Bneg.MLN	-1.99602	0.93396	-0.832365	0.0505975	-0.998637	0.350497	-0.0402268	-1.3607	-2.16431	0.771674	-0.0842152	0.597103	-0.354166	1.06489	-1.71237	-0.597317	0.488319	-3.00656	-1.81105	1.66136	-0.260707	-5.03727	-1.44446
DC.8neg4neg11Bneg.SP	-1.30934	2.51385	1.7505	1.31629	0.751955	1.30669	-0.0158124	-0.547707	0.370769	-0.219296	-0.442019	0.738224	-0.371317	1.78831	2.65169	1.79338	0.396642	0.135754	-0.345623	2.25384	-0.430628	-1.86584	0.198059
GN.BM	-2.05398	0.426835	1.09249	2.4316	3.51907	-0.91459	-0.274743	-1.69922	0.403814	0.920197	0.499484	1.55624	0.00978903	-0.51389	0.780369	-0.203512	1.08671	-2.0579	0.466889	0.802728	0.692305	-1.31932	-1.86276
MF.IIneg480HI.PC	-1.57184	0.463991	1.63283	2.45922	5.82715	-0.630766	-0.390076	-0.244857	0.345113	2.28906	0.827824	2.78743	0.685767	-1.90548	3.40245	0.608374	2.21229	4.17482	-0.857474	4.72522	-0.61878	1.27316	-1.46069
MF.RP.SP	-2.39707	-1.80669	-1.89686	-0.503467	0.806356	-1.01536	-0.738922	-1.92745	-4.20526	0.979671	1.22799	1.59473	0.428201	-2.86155	-1.59441	-0.807371	-0.520441	1.99762	-2.28695	1.97126	-0.518637	-4.73971	-1.92979
MF.THIO5.IIpos480INT.PC	-1.90405	-0.531821	0.815244	1.42721	4.37689	-1.21741	0.222724	-1.89618	-2.41232	1.26767	0.409967	2.71019	1.09002	-2.82938	1.35703	0.230386	2.1582	2.8756	-0.981532	3.43789	-0.229117	-2.94162	-1.9772
MF.THIO5.IIpos480LO.PC	-1.8628	0.757018	1.18845	1.48516	5.11737	-1.01342	0.467296	-1.98143	-0.856524	0.879299	-0.571159	2.40367	1.06733	-2.28881	1.37084	-0.597903	1.26809	3.53246	-1.67586	2.14171	0.441194	-3.55486	-2.07291
MF.THIO5.IIneg480HI.PC	-2.15463	-0.0472464	0.770771	1.70203	4.18897	-1.22549	0.32779	-1.21813	-2.14734	2.18035	0.673776	2.90337	0.571406	-2.81245	0.977355	-0.27971	1.16536	2.15279	-0.225178	3.9514	-0.138771	-1.99264	-1.70482
MF.THIO5.IIneg480INT.PC	-1.88855	-1.70482	1.38136	1.80483	4.2632	-0.810926	0.171483	-2.07603	-1.35203	1.52888	-0.387638	2.72606	0.488986	-2.42802	1.25113	-0.519562	1.24867	2.93167	-0.805625	2.77574	-1.0082	-2.56054	-1.83123
MO.6CposIIpos.BL	-1.32483	-0.619281	-0.128457	1.01301	3.44378	-0.331458	-0.646249	-2.36156	-2.53435	0.494172	0.791655	3.36837	-0.585789	-0.888649	-0.873727	-0.171568	1.52727	0.289247	-0.161215	1.8096	-0.152885	-1.97983	-1.37847
MO.6CposIIneg.BL	-1.08579	-1.57645	-0.297257	1.14574	3.82657	-0.75662	-0.580808	-2.13499	-2.57313	0.719032	0.300678	2.0939	-0.122397	-1.59551	0.287714	-1.67004	0.298083	1.80087	-1.45221	0.209829	-0.192353	-0.945953	-1.83085
MO.6CposIIneg.LN	-0.952271	0.37732	0.0192603	1.60883	3.42269	0.488769	-0.907018	-1.24864	-1.41467	-0.0475102	0.0257898	3.05705	0.377006	-1.04327	-1.30826	-0.318669	1.2348	-3.78324	0.394889	-0.0258357	0.273073	-2.77073	-1.14484
MO.6CnegIIpos.BL	-0.61248	-1.40252	0.132251	1.14869	3.73413	0.0504366	-1.39984	-2.00567	-0.711648	0.502015	-0.224699	2.84845	-0.61719	-1.16142	-1.52022	0.705335	1.16543	-2.68546	0.756556	1.13158	0.603111	-4.27567	-1.47023
MO.6CnegIIneg.BL	-2.23578	-2.31357	0.65819	0.455212	1.13366	-1.42003	-0.590988	-3.49091	-2.11648	1.06633	0.615924	2.48732	-1.9396	-0.922411	-2.19497	-0.486795	0.566853	0.897978	0.761236	3.21186	0.0198863	-3.92553	-1.74635
MO.6CnegIIINT.BL	-2.34559	-3.08942	0.996956	0.95706	3.17458	-1.34211	-0.251846	-2.89685	-2.73008	1.04072	0.835282	2.6653	-1.72647	-0.637153	-0.642071	-1.6442	0.392275	1.18328	-1.18989	2.5861	-0.0361096	-3.33483	-1.65222
T.8EFF.SP.OT1.D10.LISOVA	0.0855551	-2.3028	-3.7773	-1.93671	-6.42284	0.275789	-0.75032	-1.37797	-4.31244	-1.2552	-1.1559	-1.42334	0.426035	-0.113197	-4.09666	0.365729	-1.55351	-6.02708	0.345433	-2.14067	0.628552	0.308341	-1.14411
T.8EFF.SP.OT1.D15.LISOVA	-0.041184	-3.02392	-3.32952	-1.82606	-6.41036	0.090313	-1.14314	-0.586015	-5.61814	-0.792003	-0.672869	-0.568575	-1.07325	-0.222584	-4.45618	0.54389	-1.38738	-6.01583	0.569089	-1.20614	0.0990564	-4.45522	-1.35572
T.8EFF.SP.OT1.D6.LISOVA	1.05092	4.21481	3.68723	2.18196	2.86743	2.77859	0.653251	2.28007	4.50893	-1.54145	-0.0883602	-2.42154	1.09376	1.51825	4.1152	0.745506	-0.318744	-1.02639	2.21194	-3.27945	1.36803	10.3951	0.81252
T.8EFF.SP.OT1.D8.LISOVA	0.956766	-1.47269	-3.09441	-0.950517	-4.59984	0.770936	-0.84567	-0.487829	-2.91135	-0.534309	-0.949733	-0.930814	-0.00789085	-0.85723	-3.02741	0.725379	-1.25412	-5.32472	0.742265	-1.70192	0.734149	1.11903	-0.265376
T.8MEM.SP.OT1.D100.LISOVA	-0.896028	-4.88605	-3.68836	-1.88254	-6.15725	1.16579	-0.779383	-1.10891	-5.79696	-1.44172	-1.01134	-1.18074	-0.526209	-0.67432	-5.23599	-0.330003	-2.54133	-6.20386	0.394763	-3.37973	0.132185	-4.15716	-0.417182
T.8MEM.SP.OT1.D45.LISOVA	-0.880069	-4.75643	-3.64835	-1.53021	-6.01455	1.58417	-0.33071	-1.04346	-6.58818	-1.11195	-0.982343	-0.588089	-0.169367	-0.899123	-5.07937	-1.05432	-2.34551	-5.6659	-0.696685	-2.18013	0.431134	-5.10123	-0.648988
B.FO.LN	-1.73601	-3.57857	-3.44088	-1.77157	-3.4062	-1.42921	-0.170093	-2.91465	-1.94701	0.261245	-0.765448	-0.686404	0.187719	-1.26152	-6.61321	-0.580604	-1.86533	-5.53942	0.64775	-2.79089	-1.18539	-6.41617	-1.30717
B.FO.MLN	-2.20564	-3.83548	-3.95312	-1.92899	-3.14996	-1.50687	-0.225223	-3.22662	-3.58773	-0.545609	-1.16725	-1.50087	-0.828966	-1.13214	-6.71876	-1.51154	-2.99695	-4.81308	-1.39888	-2.15848	-1.16934	-6.38801	-1.50893
EP.MECHI.TH	0.00816687	-1.47425	1.50853	0.667676	-1.4708	-0.0421404	-0.238616	-1.54141	-1.93568	1.86035	0.826949	1.04257	-1.40108	0.60174	2.17484	2.11292	3.09137	1.05035	0.139092	2.28271	-1.10832	-4.47656	0.187752
FI.MTS15pos.TH	0.837276	3.94152	2.75974	1.65383	2.69394	-0.797722	-1.42171	-1.57354	-1.44442	2.85004	0.963947	3.20027	-0.931335	0.300871	0.841093	0.583901	1.48343	2.4956	-1.17566	6.54338	-1.20742	-2.98877	-0.318567
FI.SK	0.774221	1.72305	2.39673	1.85864	3.76869	-0.931464	-1.49797	-1.15681	-1.57368	2.72592	0.985654	2.99238	-1.06013	0.376339	0.473296	1.05268	2.4287	1.90378	-0.240403	7.0406	-1.20238	-4.42136	-0.232026
ST.31neg38neg44neg.SLN	0.655112	2.37255	2.46904	1.9278	4.05625	-0.572689	-1.55996	-1.31058	-0.975021	2.43337	1.19327	3.32886	-1.95149	0.322549	0.137451	1.53661	2.77629	1.82741	0.555344	6.28382	-0.817825	-3.41881	-0.302349
DC.103pos11Bpos.SALM3.SI	-1.3098	3.96029	3.86095	3.65728	5.92285	1.40839	0.702281	0.308652	3.66346	-0.527553	0.916973	1.36822	-0.0124045	0.739355	5.43393	1.50909	3.34546	-0.53957	-0.596422	3.2075	0.8699	-0.99641	-0.031159
DC.103pos11Bpos.SI	-1.03157	3.51782	3.52434	2.92205	6.00231	1.29078	0.967247	0.246089	3.29005	-0.455186	0.964946	0.591373	1.59941	0.401424	5.53704	0.482823	2.01071	0.984326	-0.228237	1.27942	0.948587	-1.2054	-0.31253
DC.103pos11Bneg.LULN	-0.502219	2.48836	0.486186	0.863205	-1.32641	-0.52243	-0.948281	-2.80769	-2.3992	0.90573	0.771039	1.44537	-0.538046	-0.297669	-2.5807	0.650071	1.08828	-2.03046	-0.458042	3.29485	-0.86485	-5.80662	-1.78706
DC.103pos11Bneg.SALM3.SI	-0.345164	4.65239	3.71293	2.83772	6.03582	0.972423	0.921801	1.95579	4.81437	-0.313084	0.222855	-0.996599	1.70879	-0.0548957	6.53072	0.0916514	1.8536	4.27358	-0.895829	1.88805	0.365917	1.36571	0.480853
DC.103pos11Bneg.SI	-1.11874	3.3913	3.74376	2.87871	6.00269	1.11729	0.799942	1.65268	3.25834	-0.535498	0.609133	0.0763256	1.84258	-0.141998	5.78293	0.16321	2.31969	2.78451	-1.0625	2.3407	-0.0147594	1.44632	0.121881
DC.103neg11Bpos.LULN	-1.24984	2.81696	1.08402	2.07489	3.39937	0.52378	0.214058	-3.04042	-2.49305	-0.0926415	1.29964	2.34517	-0.154709	-0.26232	-0.114167	-0.96495	1.18587	-2.1199	-1.29858	1.46321	0.172247	-5.40043	-1.75323
DC.103neg11Bpos.SALM3.SI	-1.44142	1.60458	1.96355	2.17723	5.5613	0.419559	-0.249688	-0.221888	-0.974216	0.0606403	0.475534	3.12815	0.0916694	-1.96551	0.518157	-0.652166	0.703501	-1.18107	-1.18532	1.59992	-0.487639	-0.895196	-1.37589
DC.103neg11Bpos.SI	-1.65724	0.157705	1.33145	0.813907	3.55588	-0.866939	0.302639	-1.31513	-2.80343	-0.571137	0.384256	2.48815	1.00003	-1.35299	-0.288339	-2.40526	-1.10705	-0.0990112	-1.82332	1.03429	-0.565057	-2.12432	-1.74065
DC.103neg11Bpos24pos.LU	-0.475374	4.20616	3.07447	4.01899	5.99391	0.534848	-0.413375	-1.71625	-0.18029	0.597548	1.18356	2.69893	-1.43686	0.056783	1.29546	0.939465	2.27543	-1.34639	-0.0398149	2.86674	0.00560512	-3.09073	-1.44338
DC.103neg11Bpos24neg.LU	-0.604688	2.144	0.35447	2.76713	4.98903	0.549943	-1.76176	-1.8182	-1.33913	0.868927	0.582875	3.95342	-1.12548	-0.896494	-0.0487462	0.707516	1.62548	-1.30527	-0.511073	2.08073	-0.153817	-3.7874	-1.9659
DC.103neg11BposF4neg80LO.KD	-0.937868	4.10867	2.05751	2.86987	6.25901	1.15371	0.247901	-1.07375	3.06504	0.0552331	0.125436	-0.0611472	0.96373	-0.53653	4.1288	0.0545914	1.16409	1.54627	0.919301	1.4119	1.59087	2.08149	-1.49465
DC.11CLOSER.SALM3.SI	-1.13014	3.15569	2.4116	2.73656	5.72651	0.197526	-0.140069	-0.623502	-0.160417	0.147003	0.665821	2.08781	-0.0785664	-1.35677	1.23835	0.362532	1.56517	-2.19743	-0.739293	0.561507	-0.70008	-1.15677	-1.45874
DC.11CLOSER.SI	-1.30788	3.05239	1.67948	1.94257	5.87453	0.215171	0.510257	-0.622361	-1.28417	-0.00832444	0.132089	2.72547	0.227382	-0.321472	1.17957	-1.9327	-0.413545	1.49795	-1.63437	1.61179	-0.110351	-0.890546	-1.59709
DC.8neg4neg11Bpos.SLN	-0.221058	3.23444	2.21318	2.36385	4.23493	0.656822	-0.649888	-2.93724	-1.58956	0.510211	0.592923	1.67061	-0.688351	0.779734	1.53368	0.53959	1.98967	1.15068	-0.823339	2.23425	-0.0660136	-3.10622	-0.894015
DC.8neg4neg11Bneg.SLN	-0.883589	3.67158	2.40952	2.68908	4.65024	1.45417	-0.713195	-2.86844	0.856377	0.586421	0.905622	0.0487032	-0.0397758	-0.321627	3.32068	2.8526	3.22121	-0.905793	0.356925	1.90446	0.789301	-2.13369	-1.1184
DC.IIpos480LO.PC	-0.97228	3.2426	2.78286	2.61629	6.62981	0.756512	0.269251	-1.43888	2.32729	0.567657	0.570434	2.03622	1.61564	-1.75353	4.68993	0.615064	2.4174	4.50164	-0.642912	1.67946	-0.223998	1.62046	-1.28371
DC.PDC.8pos.MLN	-2.2694	-3.93424	-3.71838	-1.58814	-4.44797	0.71593	-0.539035	-2.22123	-4.75892	0.540337	-0.0417712	0.845886	-0.25584	-1.83538	-4.96648	-1.45062	-1.79805	-1.29521	-2.2172	0.0293537	-0.430769	-6.40316	-1.77583
DC.PDC.8pos.SLN	-2.82001	-4.46338	-3.64066	-1.60218	-4.3654	0.532801	-0.599221	-1.57896	-5.02263	0.680042	-0.109348	1.19966	-0.218682	-2.12112	-4.92247	-1.2907	-1.25732	-1.24602	-1.57055	0.369085	0.0383487	-6.03872	-1.64572
GN.ARTH.BM	-1.91301	0.309241	0.992665	2.46974	3.82119	-0.503415	-0.254822	-1.79616	0.657786	0.670497	0.260638	2.10539	-0.202489	-0.977563	0.107461	0.124259	1.36163	-1.36424	0.359124	1.0466	0.448868	-2.41652	-1.66705
GN.BL	-0.869597	-0.368498	-0.581975	1.66826	3.55956	-0.812107	-1.15567	-2.03016	-1.17343	0.383806	-0.161517	2.81575	-1.06233	-1.05229	-0.881626	-0.0507623	0.928191	-3.1001	0.0717139	-0.135146	0.792235	-4.26533	-1.77389
GN.THIO.PC	-0.415114	0.119726	-0.435367	1.84608	3.2721	-0.607083	-0.484487	-2.41203	-0.916011	0.484542	0.121027	2.96311	-0.140109	-1.37189	-0.708428	0.255816	1.49949	-2.95771	0.0868423	0.535271	1.2469	-2.58545	-1.79874
GN.URAC.PC	-0.503485	0.0605976	-0.703643	1.56408	3.45529	-0.557455	-1.04077	-2.23691	-0.908874	0.539625	-0.313191	2.77787	-0.740568	-1.36905	-1.04941	-0.0722981	1.06149	-2.62579	0.0390561	0.0529467	1.15397	-2.91509	-1.74012
MF.169pos11CHI.SLN	-0.492664	3.2707	2.32583	3.07213	4.62085	0.530581	-1.38731	-0.651903	0.892311	0.108793	1.37245	3.09612	-1.13497	0.0494229	2.49077	2.39506	2.24484	-1.49322	0.40474	-0.353912	-0.808958	-1.73405	-0.379769
MF.BM	-0.499729	2.59413	2.18864	2.1198	6.27383	1.41978	0.47437	2.84575	3.24325	0.0403863	0.628143	1.34629	1.26649	-1.51805	3.47076	1.30455	2.54398	1.76298	1.36278	-0.498485	1.97476	0.485666	1.75794
MF.MEDL.SLN	-0.713604	0.947074	0.331928	1.91238	4.39529	0.281449	-1.78541	-0.997672	-1.09191	-0.149298	0.491449	3.07413	-0.0597605	-1.13156	-0.487684	-0.0217965	0.558297	-3.96842	-0.126945	0.103008	0.233719	-0.746915	-1.51501
MF.SBCAPS.SLN	-0.452561	2.04777	0.485818	1.82762	2.74787	0.192788	-1.73063	-0.631088	-1.01954	-0.107767	0.304534	2.43199	-0.848854	-0.567439	-1.93859	-0.0283803	-0.173311	-5.19681	0.421489	-1.18366	0.142375	-4.41053	-1.36587
MICROGLIA.CNS	-1.83409	-1.21422	-1.64465	-0.45716	-0.314844	-0.636674	-0.494706	-2.82765	-1.35406	1.05539	-0.171667	3.9267	-1.32264	-2.07697	-2.4	0.599882	1.03669	0.821362	0.559237	2.73501	-1.35879	-5.40744	-1.82556
MO.6CposIIneg.BM	-1.2149	4.10202	2.90674	3.36387	6.43675	0.813848	0.285186	1.07575	3.6793	-0.227697	0.502261	2.54776	0.98943	-1.4021	3.75393	1.58423	2.95196	0.367429	2.06665	0.0518891	0.378234	1.22293	1.90461
MO.6CnegIIneg.BM	-1.30889	1.15624	2.21579	1.74938	5.32691	0.389632	-0.301963	-0.400109	1.8091	-0.0263732	-0.000394417	3.75006	-0.326329	-1.59837	0.245898	0.695404	1.54901	0.24649	1.81391	0.498481	0.230365	-0.704386	0.109475
GN.ARTH.SYNF	-0.412665	0.322205	-0.00924828	1.62443	3.97843	0.000362523	-1.2393	-1.61732	-0.586433	0.584712	-0.176161	3.30681	-0.441753	-0.959699	0.0645584	0.284687	1.23016	-2.88615	0.0307254	0.250284	0.638991	-2.14808	-1.49759
MATTGD.VG1pos.TH.B6	1.71454	0.9765	0.0735847	0.220863	-2.63082	-0.169676	-1.0142	1.25604	-1.94447	0.384693	-0.119988	0.908476	-1.5392	1.01039	-0.652141	0.234748	-0.942894	-4.68403	0.704934	-0.973769	-0.701284	0.532015	0.722369
MATTGD.VG2pos.TH	-0.816853	-3.62089	-1.17531	-1.16126	-6.16306	0.23249	-0.493059	-1.5202	-5.67689	0.204845	-0.354578	0.666853	-0.4848	-0.620868	-3.61646	0.133898	0.445854	-1.32901	0.185715	-0.111409	-0.471485	-8.40043	0.519906
B614WABDTREG	0.129325	-2.3591	2.65172	0.902869	-2.29384	0.344568	-0.134077	1.23516	-5.36308	0.376182	0.223551	1.97331	-1.5423	0.451513	-3.08862	-1.00642	0.899434	-1.27145	-0.669435	0.502429	-0.877463	-6.7094	-1.36927
